# Supplementary material for: A spectroscopic, structural, and computational study of Ag–oxo interactions in Ag+/UO22+complexes
Source: Royal Society of Chemistry journal article supplement (doi:10.1039/d2dt01161a), 2022-01-01
Supplement: d2dt01161a1.pdf [file d2dt01161a1.pdf]

## Electronic Supplemental Information

for

### A spectroscopic, structural, and computational study of Ag-oxo interactions in $\text{UO}_2^{2+}/\text{Ag}$ complexes

Dominique M. Brager,<sup>a</sup> Alexander C. Marwitz,<sup>b</sup> Christopher L. Cahill<sup>a</sup>

<sup>a</sup>*Department of Chemistry, The George Washington University, 800 22<sup>nd</sup> Street, NW, Washington, DC, 20052, USA.*

<sup>b</sup>*Department of Chemistry, Georgetown University, Washington, DC, 20057, USA.*

#### Table of Contents

|                                                                             |    |
|-----------------------------------------------------------------------------|----|
| <b>Figure S1.</b> Thermal Ellipsoid Plot of <b>1</b> .....                  | 3  |
| <b>Figure S2.</b> Thermal Ellipsoid Plot of <b>2</b> .....                  | 4  |
| <b>Figure S3.</b> Thermal Ellipsoid Plot of <b>3</b> .....                  | 5  |
| <b>Figure S4.</b> Thermal Ellipsoid Plot of <b>4</b> .....                  | 6  |
| <b>Figure S5.</b> Thermal Ellipsoid Plot of <b>5</b> .....                  | 7  |
| <b>Figure S6.</b> Thermal Ellipsoid Plot of <b>6</b> .....                  | 8  |
| <b>Figure S7.</b> Thermal Ellipsoid Plot of <b>7</b> .....                  | 9  |
| <b>Figure S8.</b> Thermal Ellipsoid Plot of <b>8</b> .....                  | 10 |
| <b>Figure S9.</b> Thermal Ellipsoid Plot of <b>9</b> .....                  | 11 |
| <b>Figure S10.</b> Thermal Ellipsoid Plot of <b>10</b> .....                | 12 |
| <b>Figure S11.</b> Thermal Ellipsoid Plot of <b>11</b> .....                | 13 |
| <b>Figure S12.</b> Thermal Ellipsoid Plot of <b>12</b> .....                | 14 |
| <b>Figure S13.</b> DFT ground state models for <b>1-12</b> .....            | 15 |
| <b>Sample S1.</b> Sample NBO input file .....                               | 16 |
| <b>Figure S14.</b> Experimental PXRD pattern of <b>1</b> .....              | 21 |
| <b>Figure S15.</b> Experimental PXRD pattern of <b>2</b> .....              | 22 |
| <b>Figure S16.</b> Experimental PXRD pattern of <b>3</b> .....              | 23 |
| <b>Figure S17.</b> Experimental PXRD pattern of <b>4</b> .....              | 24 |
| <b>Figure S18.</b> Experimental PXRD pattern of <b>5</b> .....              | 25 |
| <b>Figure S19.</b> Experimental PXRD pattern of <b>6</b> .....              | 26 |
| <b>Figure S20.</b> Experimental PXRD pattern of <b>7</b> and <b>8</b> ..... | 27 |
| <b>Figure S21.</b> Experimental PXRD pattern of <b>9</b> .....              | 28 |
| <b>Figure S22.</b> Experimental PXRD pattern of <b>12</b> .....             | 29 |

|                                                                                                       |    |
|-------------------------------------------------------------------------------------------------------|----|
| <b>Figure S23.</b> Ag-O <sub>1</sub> ρ <sub>BCP</sub> vs stabilization energies for <b>1-12</b> ..... | 30 |
| <b>Figure S24.</b> Ag-O <sub>1</sub> ρ <sub>BCP</sub> vs stabilization energies for <b>1-12</b> ..... | 31 |
| <b>Figure S25.</b> U=O(Ag) ρ <sub>BCP</sub> vs stabilization energies for <b>1-12</b> .....           | 32 |
| <b>Figure S26.</b> U=O ρ <sub>BCP</sub> vs stabilization energies for <b>1-12</b> .....               | 33 |

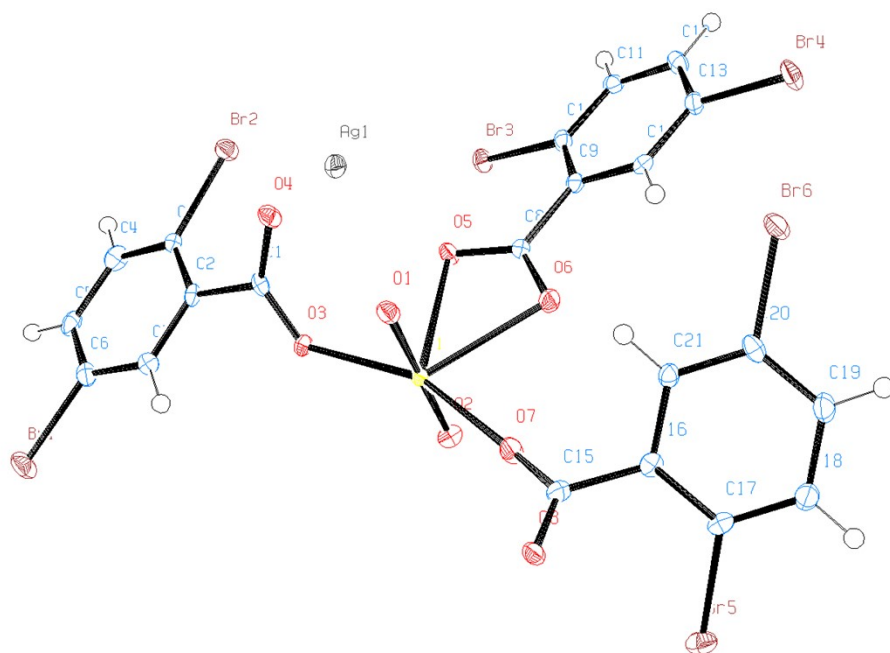

**Figure S1.** ORTEP illustration of 1. Ellipsoids are shown at 50% probability level.

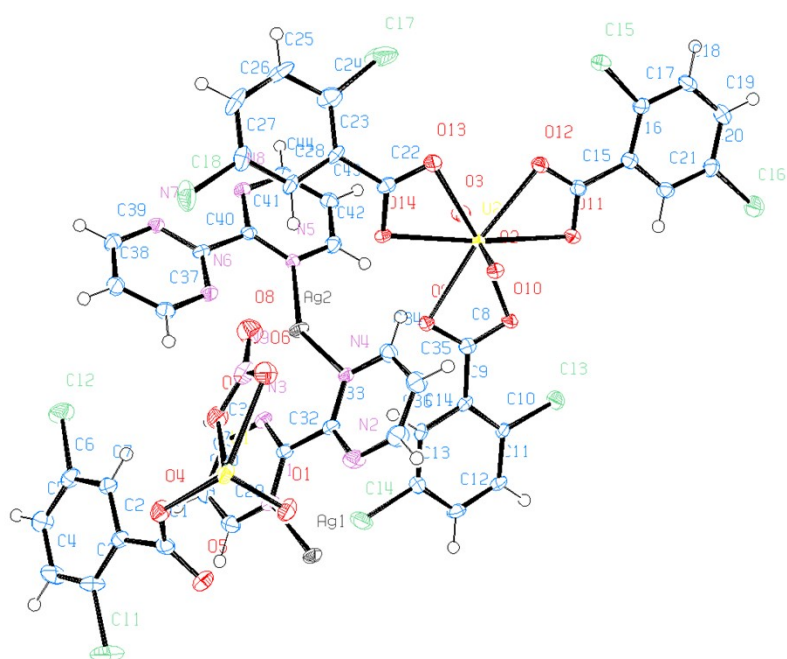

**Figure S2.** ORTEP illustration of compound **2**. Ellipsoids are shown at 50% probability level.

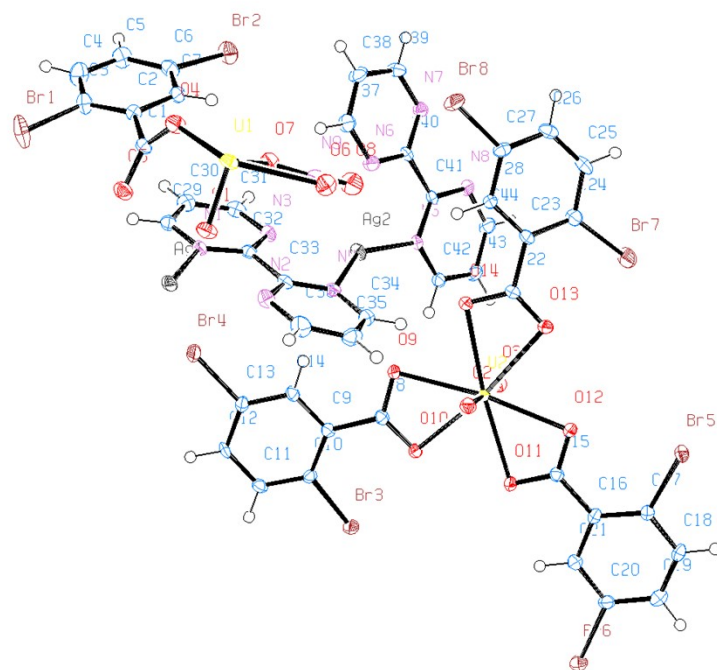

**Figure S3.** ORTEP illustration of compound **3**. Ellipsoids are shown at 50% probability level.

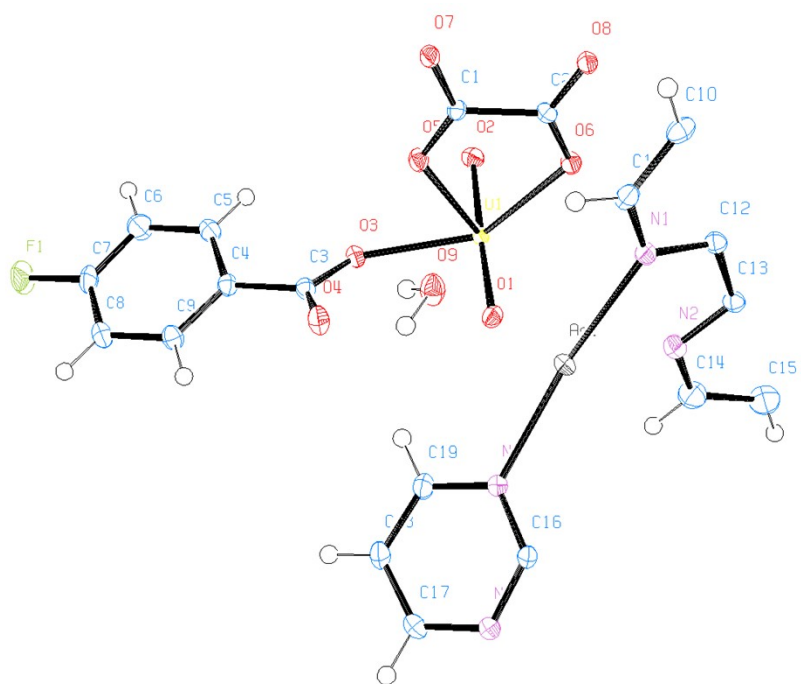

**Figure S4.** ORTEP illustration of compound **4**. Ellipsoids are shown at 50% probability level.

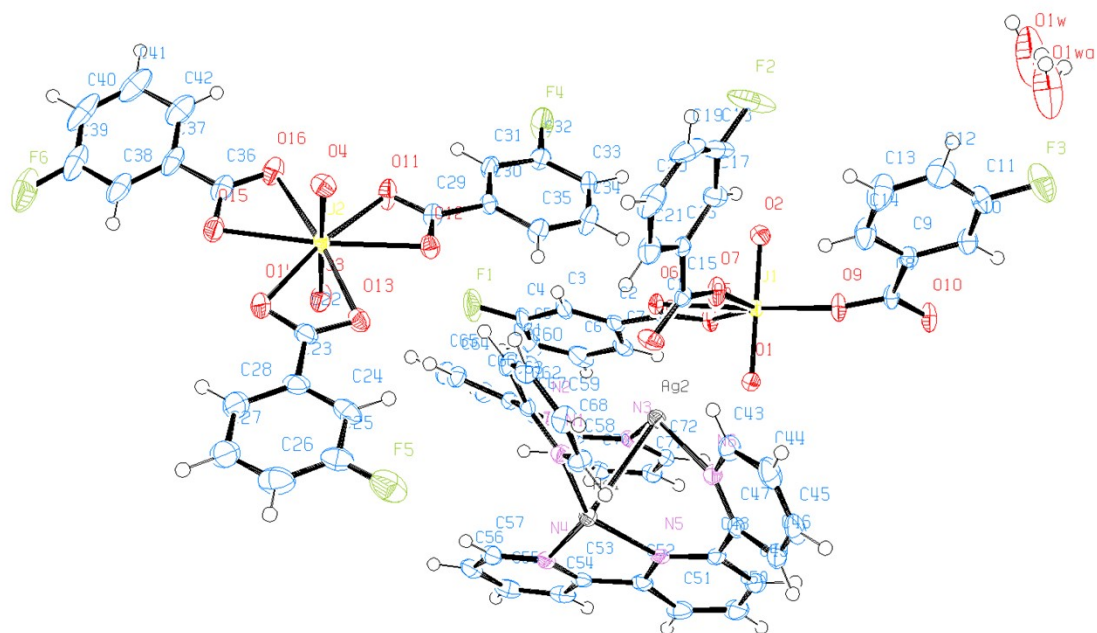

**Figure S5.** ORTEP illustration of compound **5**. Ellipsoids are shown at 50% probability level.

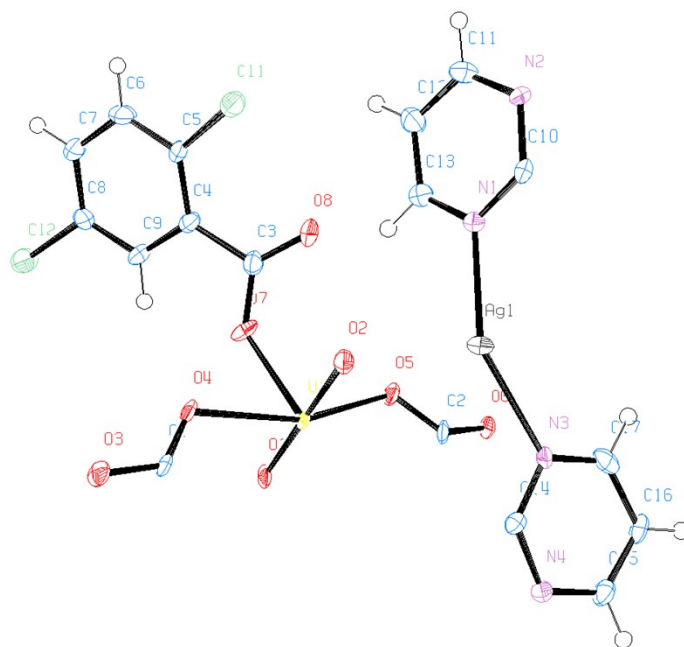

**Figure S6.** ORTEP illustration of compound 6. Ellipsoids are shown at 50% probability level.



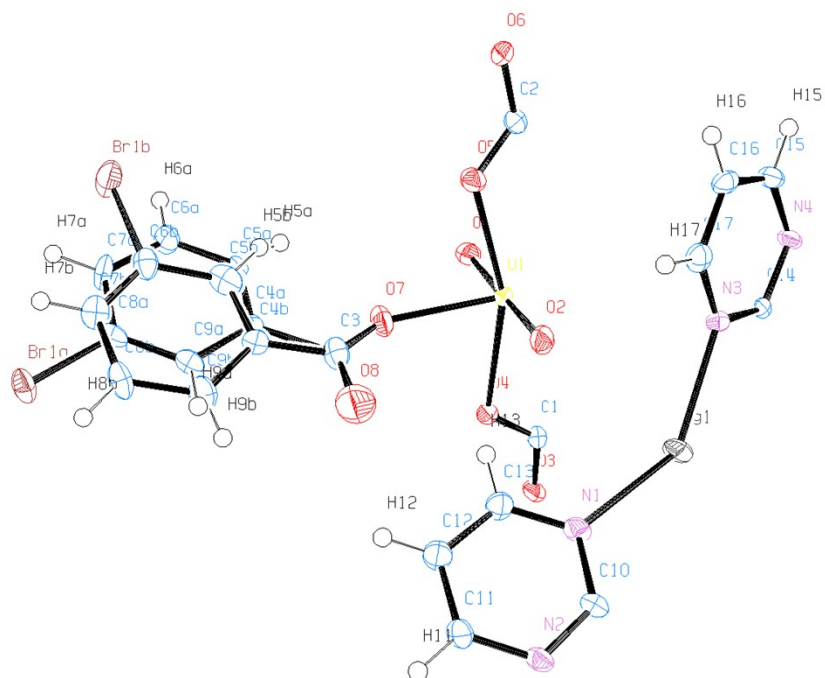

**Figure S7.** ORTEP illustration of compound 7. Ellipsoids are shown at 50% probability level.

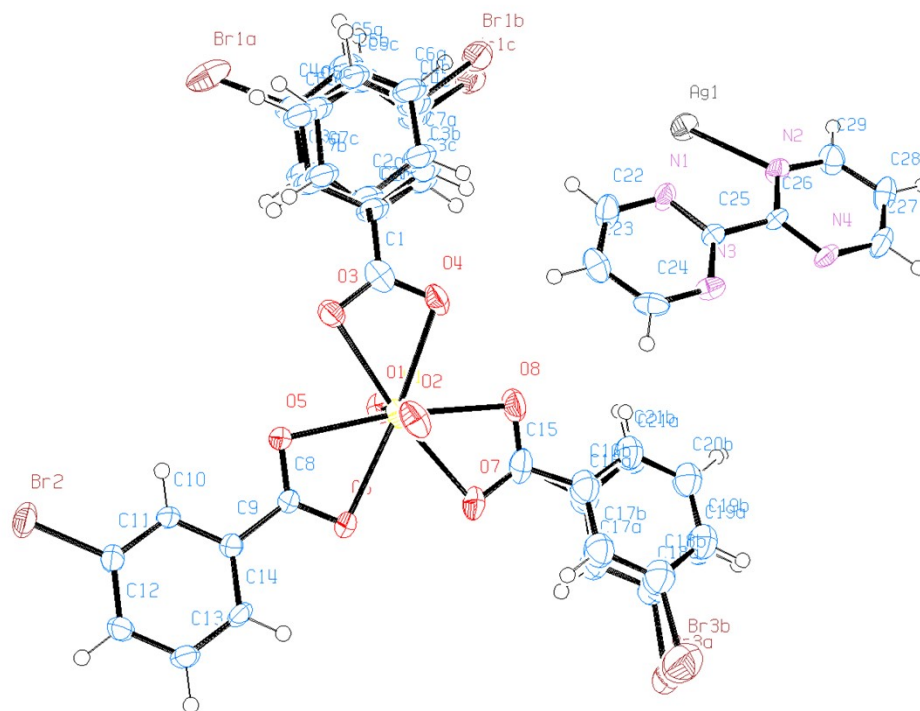

**Figure S8.** ORTEP illustration of compound **8**. Ellipsoids are shown at 50% probability level.

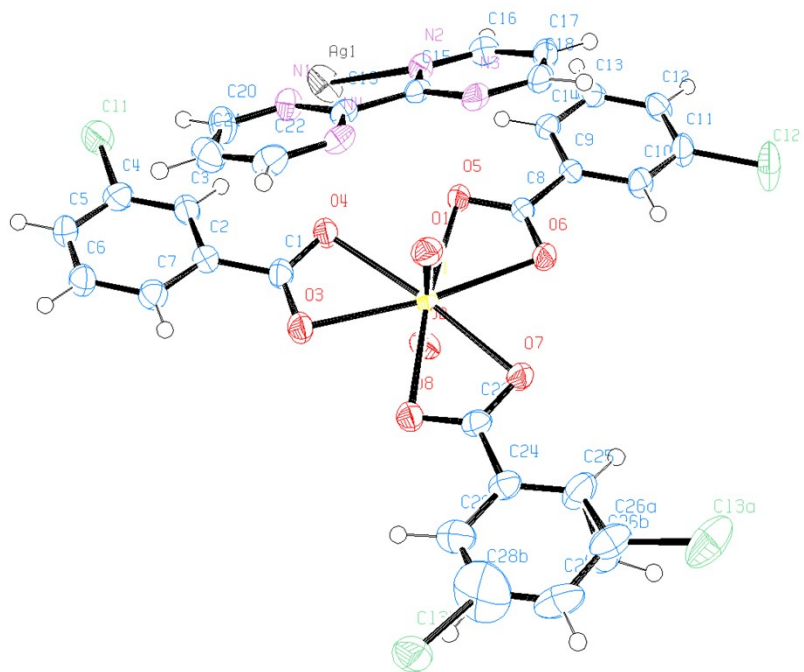

**Figure S9.** ORTEP illustration of compound **9**. Ellipsoids are shown at 50% probability level.

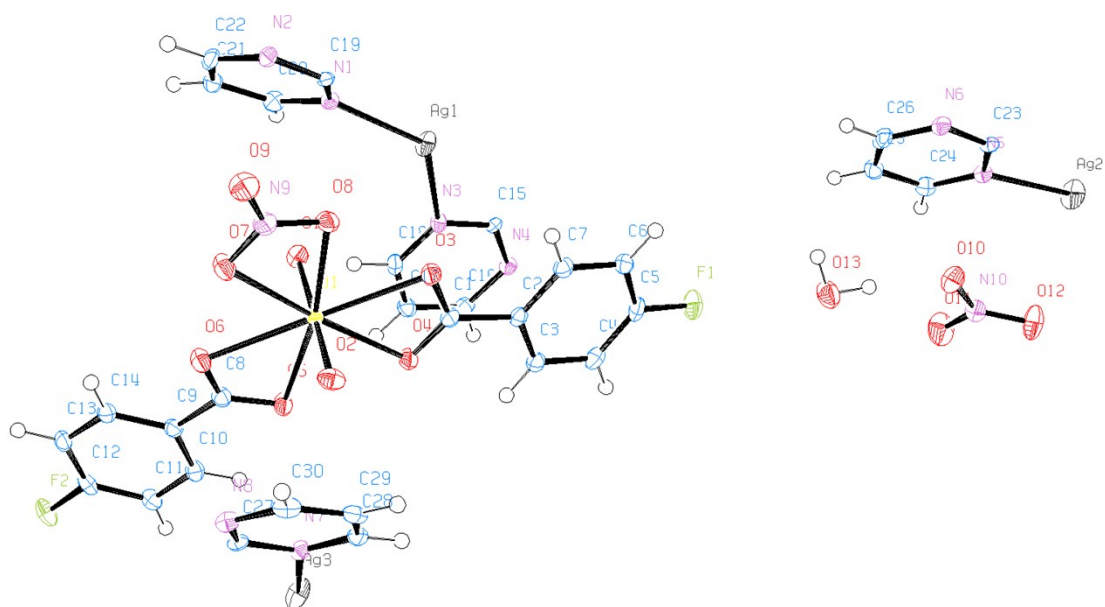

**Figure S10.** ORTEP illustration of compound **10**. Ellipsoids are shown at 50% probability level.

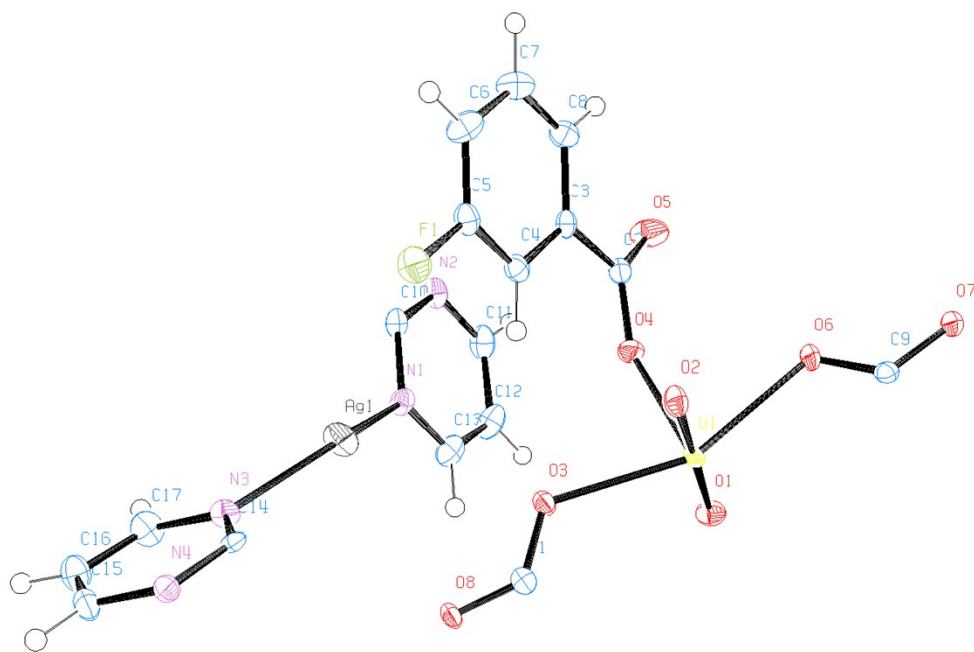

**Figure S11.** ORTEP illustration of compound 11. Ellipsoids are shown at 50% probability level.

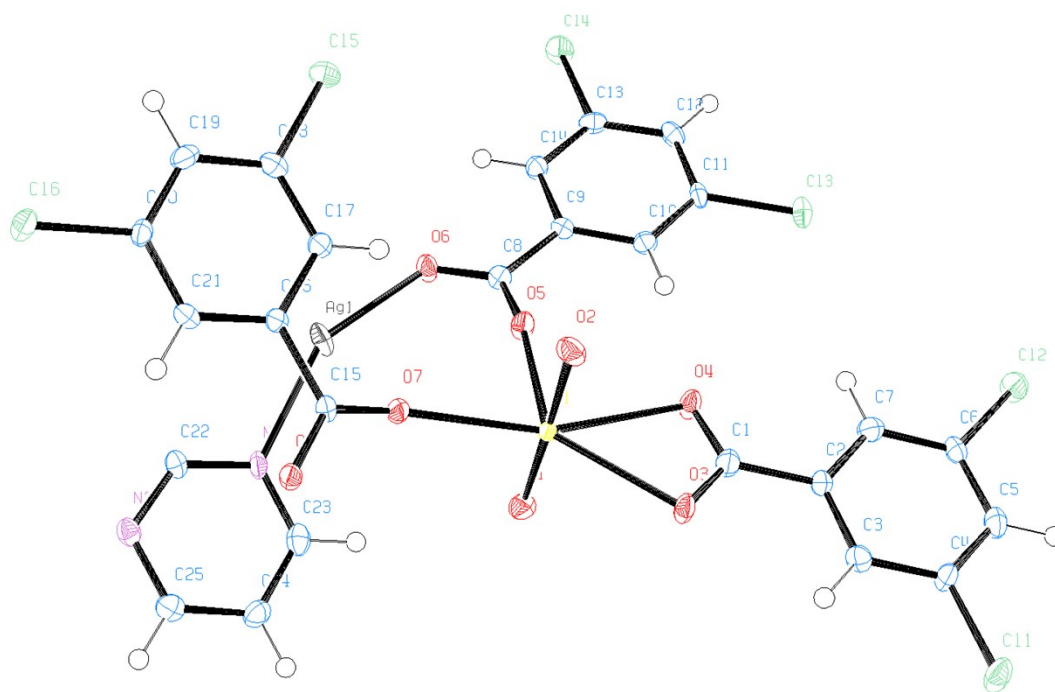

**Figure S12.** ORTEP illustration of compound 12. Ellipsoids are shown at 50% probability level.

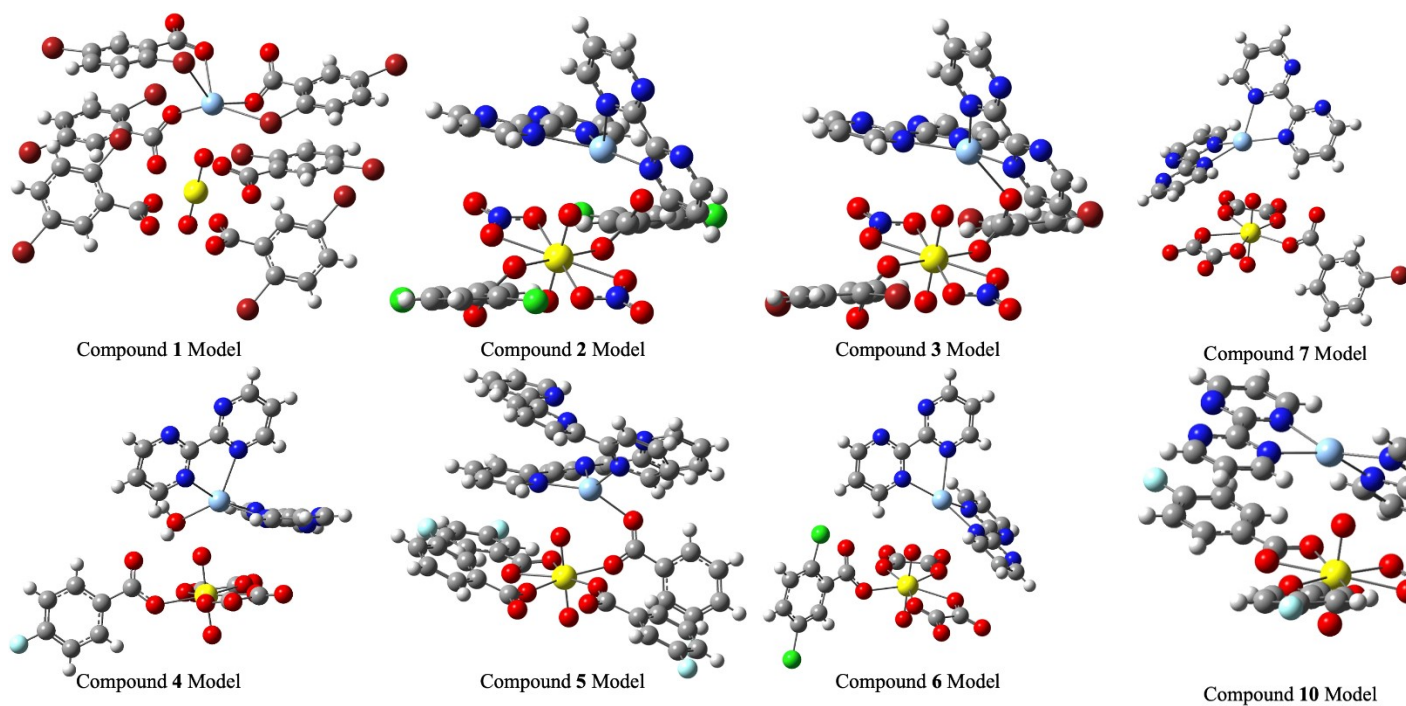

**Figure S13.** DFT ground state models for 1-12.

```
%nproc=16
%mem=2000MW
%chk=Cmpd1.chk
# b3lyp/genecp nosymm int=grid=ultrafine scf=(xqc,maxcycle=2000) pop=full formcheck
```

Cmpd1

-3 1

|    |             |             |             |
|----|-------------|-------------|-------------|
| U  | 47.29926638 | 19.57654123 | 22.42850287 |
| O  | 46.72726638 | 17.93854123 | 22.82750287 |
| O  | 47.83926638 | 21.20454123 | 22.02650287 |
| Ag | 44.38526638 | 17.13654123 | 22.82550287 |
| Br | 46.42526638 | 19.00554123 | 15.06450287 |
| Br | 41.76526638 | 20.09454123 | 19.52650287 |
| Br | 42.72226638 | 22.45354123 | 23.28150287 |
| Br | 44.19026638 | 20.84154123 | 29.45050287 |
| Br | 52.70926638 | 20.52454123 | 25.66550287 |
| Br | 47.31226638 | 18.97754123 | 28.99950287 |
| O  | 46.00826638 | 19.58554123 | 20.46350287 |
| O  | 44.08926638 | 18.49054123 | 20.86350287 |
| O  | 45.04326638 | 20.47754123 | 23.04450287 |
| O  | 46.54426638 | 20.34654123 | 24.63850287 |
| O  | 49.12526638 | 19.28954123 | 23.80150287 |
| O  | 51.12026638 | 18.36754123 | 24.13650287 |
| C  | 44.87926638 | 19.12854123 | 20.13050287 |
| C  | 44.46326638 | 19.38654123 | 18.69250287 |
| C  | 43.18926638 | 19.80954123 | 18.29050287 |
| C  | 42.90126638 | 20.06954123 | 16.97050287 |
| H  | 42.04826638 | 20.41154123 | 16.72950287 |
| C  | 43.86726638 | 19.83054123 | 15.98450287 |
| H  | 43.67026638 | 19.97654123 | 15.06650287 |
| C  | 45.10226638 | 19.38054123 | 16.37050287 |
| C  | 45.43226638 | 19.20154123 | 17.70750287 |
| H  | 46.31526638 | 18.95354123 | 17.95050287 |
| C  | 45.36926638 | 20.63654123 | 24.26050287 |
| C  | 44.39226638 | 21.14554123 | 25.29750287 |
| C  | 43.23726638 | 21.87654123 | 25.02550287 |
| C  | 42.39026638 | 22.29954123 | 26.03850287 |
| H  | 41.62726638 | 22.82454123 | 25.83050287 |
| C  | 42.65726638 | 21.95654123 | 27.35250287 |
| H  | 42.06126638 | 22.21054123 | 28.04650287 |
| C  | 43.81126638 | 21.23554123 | 27.64350287 |
| C  | 44.67626638 | 20.83854123 | 26.62950287 |
| H  | 45.46626638 | 20.35754123 | 26.84350287 |
| C  | 50.11626638 | 19.01054123 | 24.52150287 |
| C  | 50.07826638 | 19.43354123 | 25.95250287 |
| C  | 51.16726638 | 19.98454123 | 26.62250287 |
| C  | 51.13326638 | 20.24154123 | 27.98250287 |
| H  | 51.88226638 | 20.63254123 | 28.41650287 |
| C  | 49.99226638 | 19.92054123 | 28.70550287 |
| H  | 49.96526638 | 20.04554123 | 29.64750287 |



|    |             |             |             |
|----|-------------|-------------|-------------|
| C  | 48.88726638 | 19.41254123 | 28.02750287 |
| C  | 48.89926638 | 19.17854123 | 26.66950287 |
| H  | 48.12526638 | 18.85054123 | 26.22750287 |
| Br | 45.28626638 | 16.94354123 | 25.56550287 |
| Br | 44.33026638 | 14.58454123 | 21.81050287 |
| O  | 42.96226638 | 18.54754123 | 24.22850287 |
| O  | 42.00926638 | 16.56054123 | 22.04750287 |
| O  | 48.86626638 | 18.67054123 | 20.95550287 |
| Br | 47.27726638 | 16.51354123 | 19.42650287 |
| Br | 52.67426638 | 18.06054123 | 16.09250287 |
| O  | 50.86126638 | 17.74854123 | 21.29050287 |
| C  | 49.87026638 | 18.02754123 | 20.57050287 |
| C  | 49.90826638 | 17.60454123 | 19.13950287 |
| C  | 48.81926638 | 17.05354123 | 18.46950287 |
| C  | 48.85326638 | 16.79654123 | 17.10950287 |
| H  | 48.10426638 | 16.40554123 | 16.67550287 |
| C  | 49.99426638 | 17.11754123 | 16.38650287 |
| H  | 50.02126638 | 16.99254123 | 15.44450287 |
| C  | 51.09926638 | 17.62554123 | 17.06450287 |
| C  | 51.08726638 | 17.85954123 | 18.42250287 |
| H  | 51.86126638 | 18.18754123 | 18.86450287 |
| Br | 40.62726638 | 18.03354123 | 30.02750287 |
| Br | 42.86226638 | 16.19654123 | 15.64150287 |
| O  | 41.04326638 | 17.45354123 | 24.62850287 |
| O  | 40.50826638 | 16.69154123 | 20.45350287 |
| C  | 42.17326638 | 17.90954123 | 24.96150287 |
| C  | 42.58826638 | 17.65154123 | 26.39950287 |
| C  | 43.86326638 | 17.22954123 | 26.80150287 |
| C  | 44.15026638 | 16.96854123 | 28.12150287 |
| H  | 45.00326638 | 16.62654123 | 28.36250287 |
| C  | 43.18426638 | 17.20754123 | 29.10750287 |
| H  | 43.38226638 | 17.06154123 | 30.02550287 |
| C  | 41.95026638 | 17.65754123 | 28.72150287 |
| C  | 41.62026638 | 17.83654123 | 27.38450287 |
| H  | 40.73626638 | 18.08454123 | 27.14150287 |
| C  | 41.68226638 | 16.40154123 | 20.83150287 |
| C  | 42.65926638 | 15.89254123 | 19.79450287 |
| C  | 43.81526638 | 15.16154123 | 20.06650287 |
| C  | 44.66126638 | 14.73854123 | 19.05350287 |
| H  | 45.42526638 | 14.21354123 | 19.26150287 |
| C  | 44.39426638 | 15.08154123 | 17.73950287 |
| H  | 44.99026638 | 14.82754123 | 17.04550287 |
| C  | 43.24026638 | 15.80354123 | 17.44850287 |
| C  | 42.37626638 | 16.19954123 | 18.46250287 |
| H  | 41.58526638 | 16.68154123 | 18.24850287 |

C H O 0  
6-311g(d,p)

\*\*\*\*

Ag Br 0  
Def2tzvp

\*\*\*\*  
U 0  
S 3 1.00  
12098.0820000 0.000102  
1833.7573000 0.000771  
351.6863200 0.002969  
S 1 1.00  
104.3142600 1.0  
S 3 1.00  
60.9058220 0.049868  
35.5150860 -0.245313  
20.8912270 0.723847  
S 1 1.00  
10.1846470 1.0  
S 1 1.00  
2.8518510 1.0  
S 1 1.00  
1.5316160 1.0  
S 1 1.00  
0.6162030 1.0  
S 1 1.00  
0.2794940 1.0  
S 1 1.00  
0.0572530 1.0  
S 1 1.00  
0.0234430 1.0  
P 5 1.00  
2906.8451000 0.000088  
694.4005300 0.000732  
224.6347900 0.003414  
80.5205260 0.011099  
24.0802110 0.025216  
P 1 1.00  
14.0775800 1.0  
P 1 1.00  
8.2658460 1.0  
P 1 1.00  
3.4236070 1.0  
P 1 1.00  
1.7084170 1.0  
P 1 1.00  
0.6550460 1.0  
P 1 1.00  
0.2837550 1.0  
P 1 1.00  
0.1018140 1.0  
P 1 1.00  
0.0305350 1.0  
D 6 1.00  
449.0195300 0.000050  
156.3569500 0.000322

60.2424390 0.001777  
17.7723170 0.025385  
10.4543040 -0.089378  
3.5834330 0.444799  
D 1 1.00  
1.7637240 1.0  
D 1 1.00  
0.7840300 1.0  
D 1 1.00  
0.2761270 1.0  
D 1 1.00  
0.0869800 1.0  
F 5 1.00  
105.2879300 0.000228  
35.1011810 0.002308  
14.5641380 0.009253  
4.6518850 0.136949  
2.2559730 0.339801  
F 1 1.00  
1.0102740 1.0  
F 1 1.00  
0.4116800 1.0  
F 1 1.00  
0.1441200 1.0  
G 4 1.00  
105.2879300 0.000137  
35.1011810 0.001831  
14.5641380 0.019940  
4.6518850 0.110758  
G 1 1.00  
2.2559730 1.0  
G 1 1.00  
1.0102740 1.0  
\*\*\*\*

Ag Br 0  
Def2tzvp  
U 0  
ECP60MWB 5 60  
H-Komponente  
1  
2 1.00000000 0.00000000  
S-H  
1  
2 16.41403869 536.51662778  
P-H  
1  
2 9.06055606 169.54492465  
D-H  
1  
2 8.83183198 142.61559837

F-H

1

2 7.01851629 60.39307602

G-H

1

2 12.80408844 -60.1299895

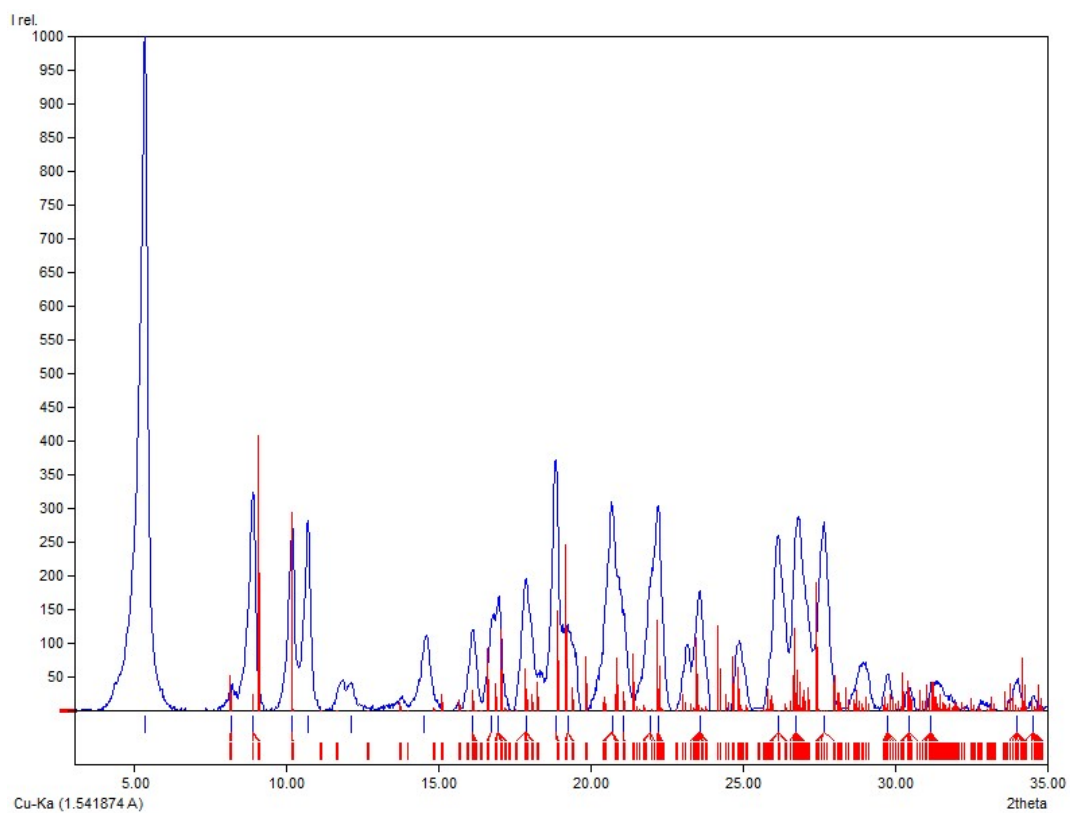

**Figure S14.** Powder pattern (blue) of **1** with overlaid calculated pattern from CIF (red). Peaks at 5.35°, 10.71°, 12.13° and 14.53° do not correspond to any of the known reactants or impurities and were not identified.

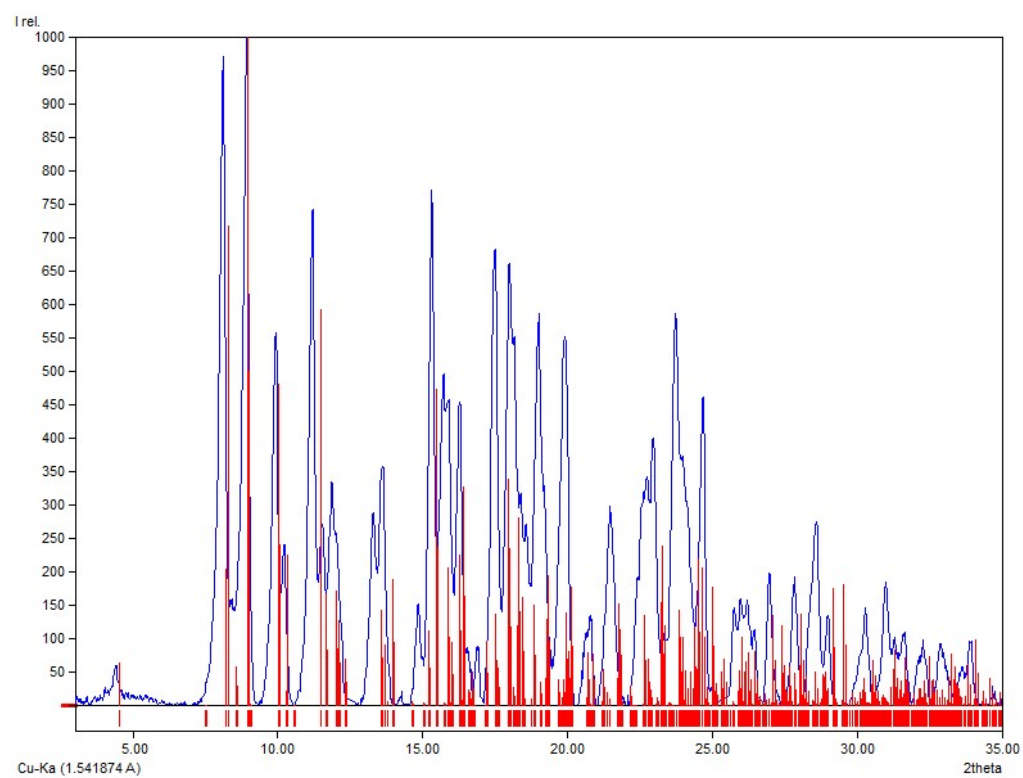

**Figure S15.** Powder pattern (blue) of **2** with overlaid calculated pattern from CIF (red).

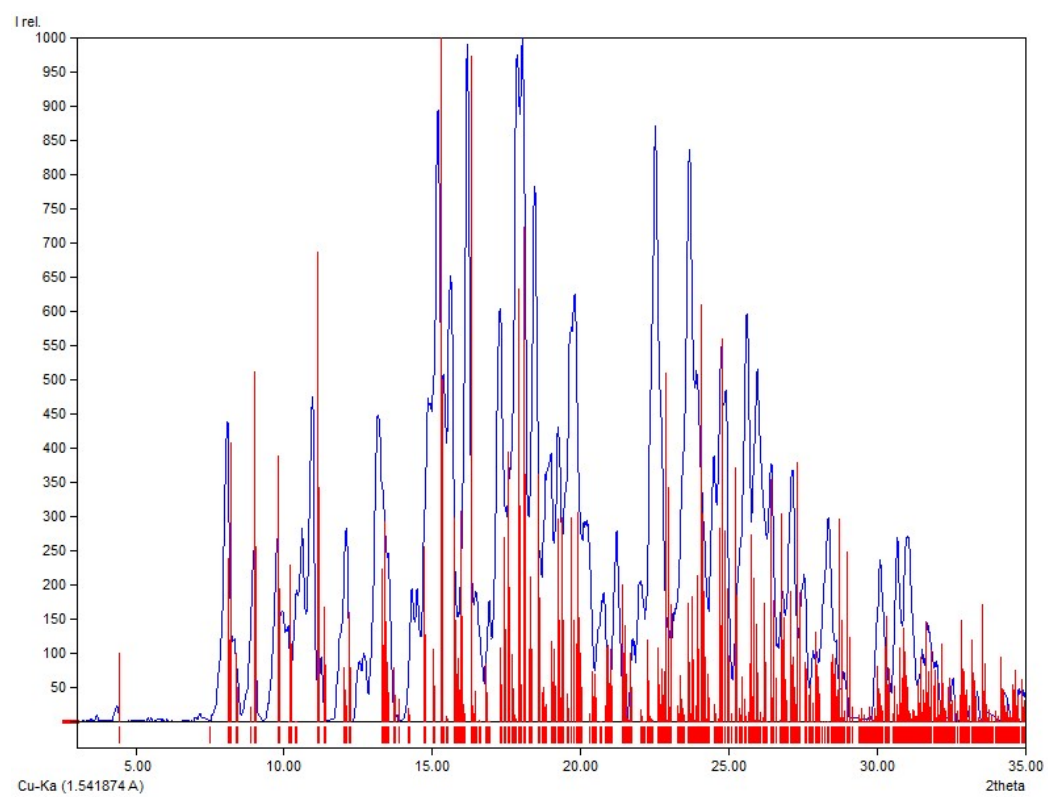

**Figure S16.** Powder pattern (blue) of **3** with overlaid calculated pattern from CIF (red).

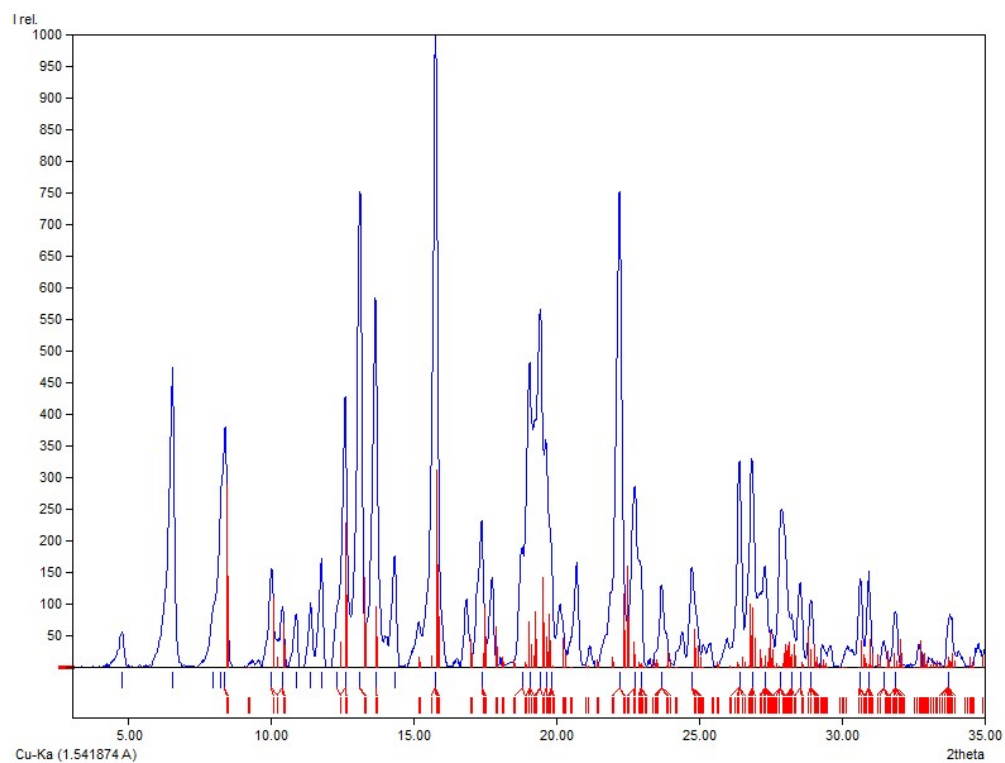

**Figure S17.** Powder pattern (blue) of **4** with overlaid calculated pattern from CIF (red). Peaks at 4.79°, 6.57°, 10.89°, 11.40°, 11.78°, and 14.34° do not correspond to any of the known reactants or impurities and were not identified.



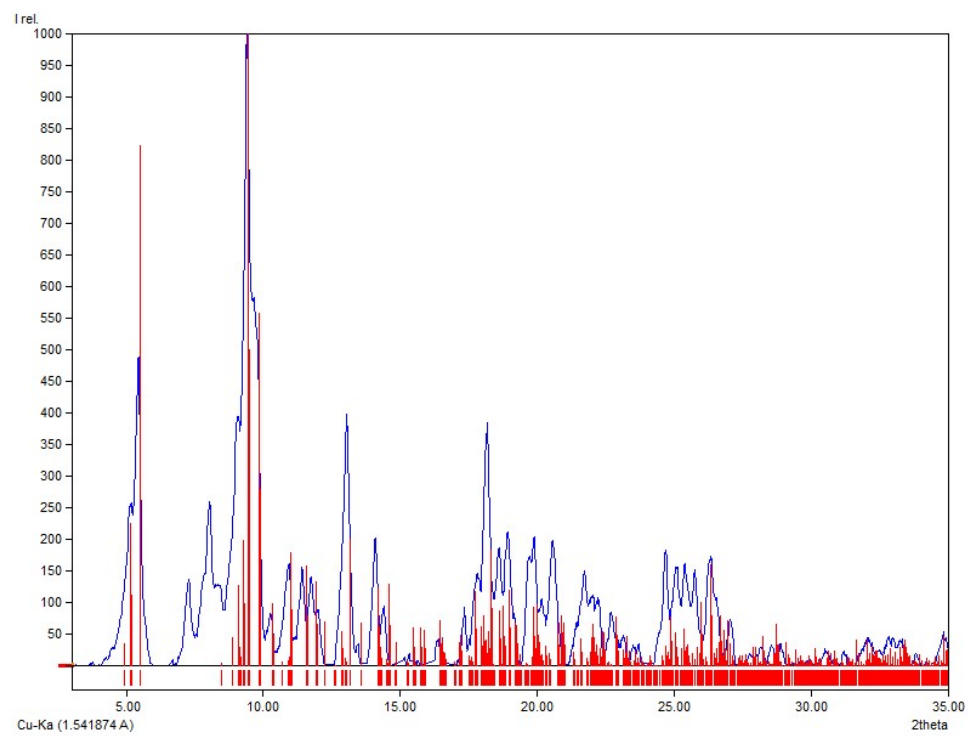

**Figure S18.** Powder pattern (blue) of **5** with overlaid calculated pattern from CIF (red). Peaks at  $7.24^\circ$ , and  $8.05^\circ$  do not correspond to any of the known reactants or impurities and were not identified.

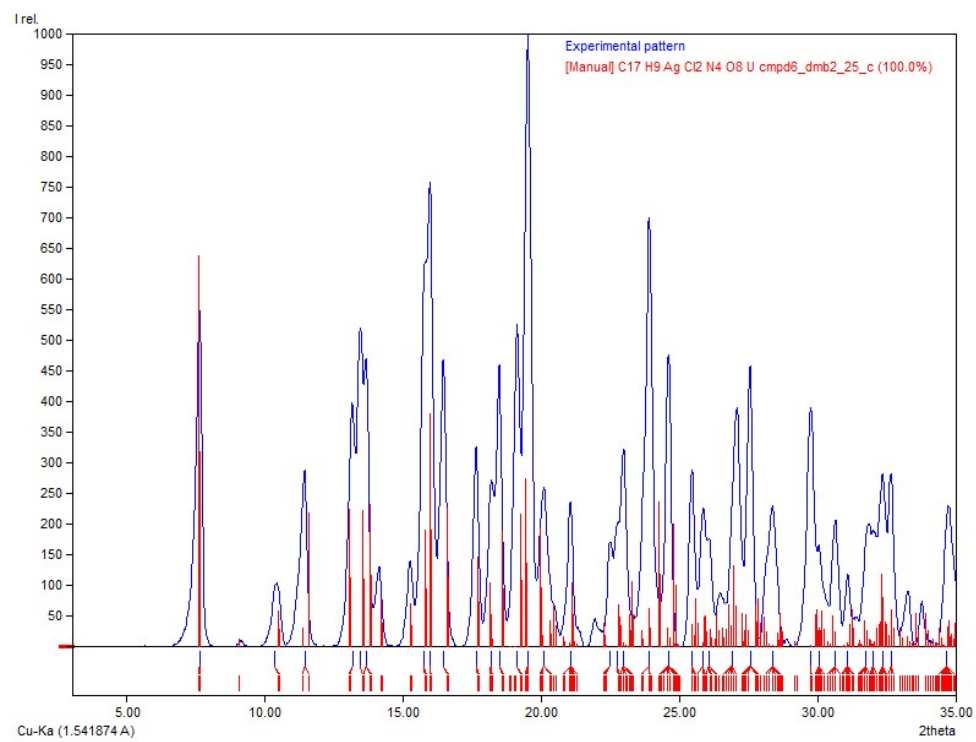

**Figure S19.** Powder pattern (blue) of **6** with overlaid calculated pattern from CIF (red).

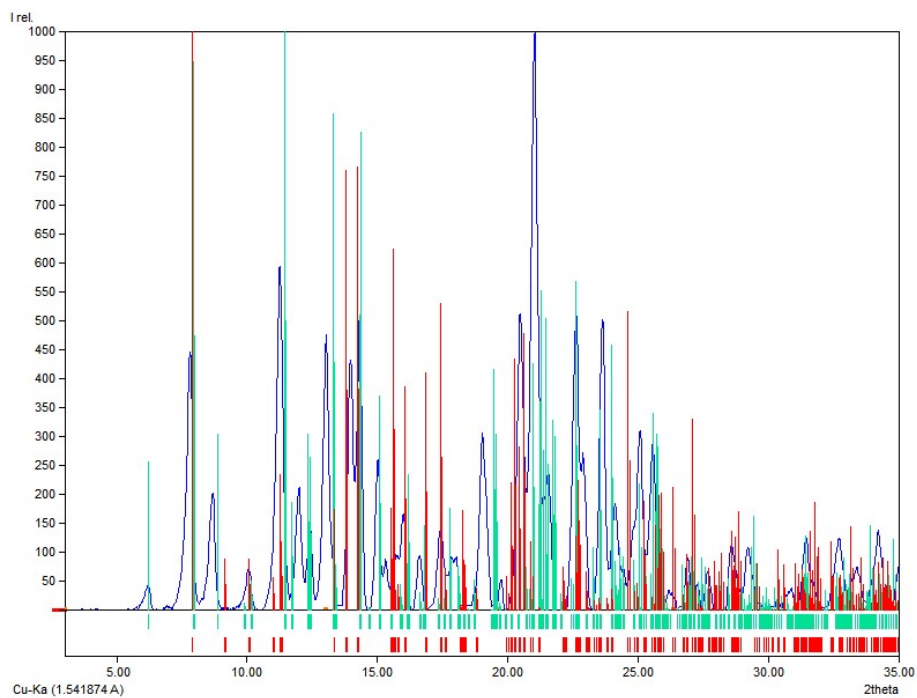

**Figure S20.** Powder pattern (blue) of **7** and **8** with overlaid calculated pattern from CIFs (**7** in red and **8** in green).

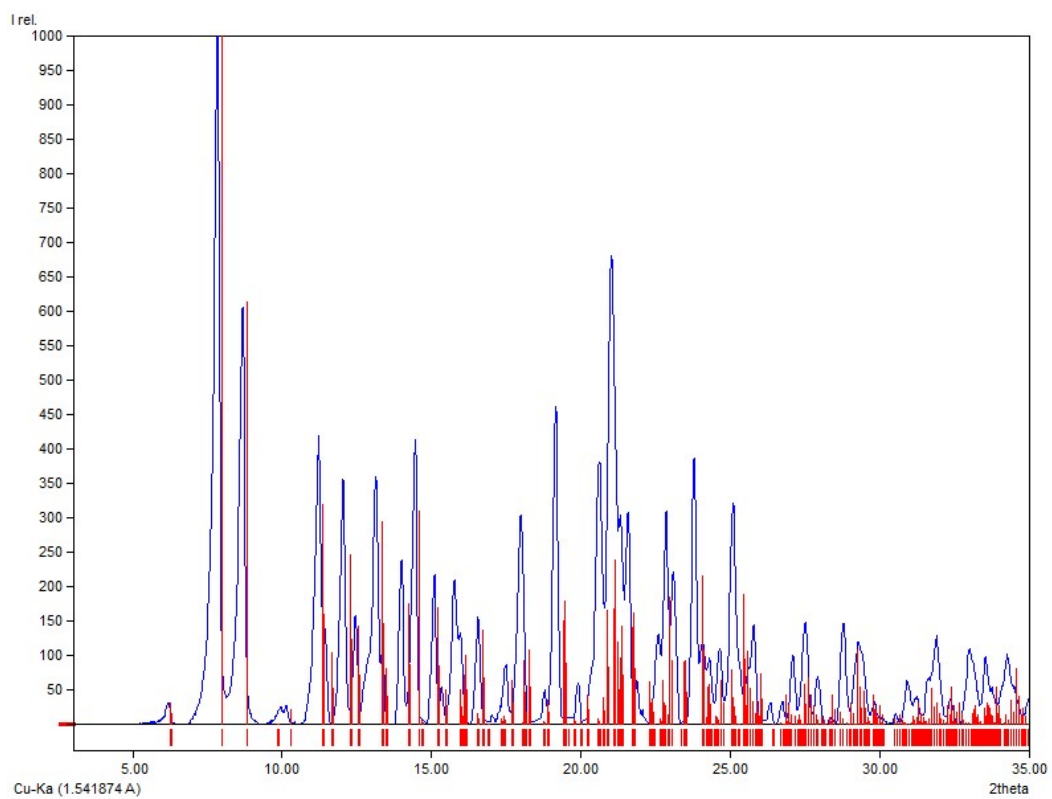

**Figure S21.** Powder pattern (blue) of **9** with overlaid calculated pattern from CIF (red).

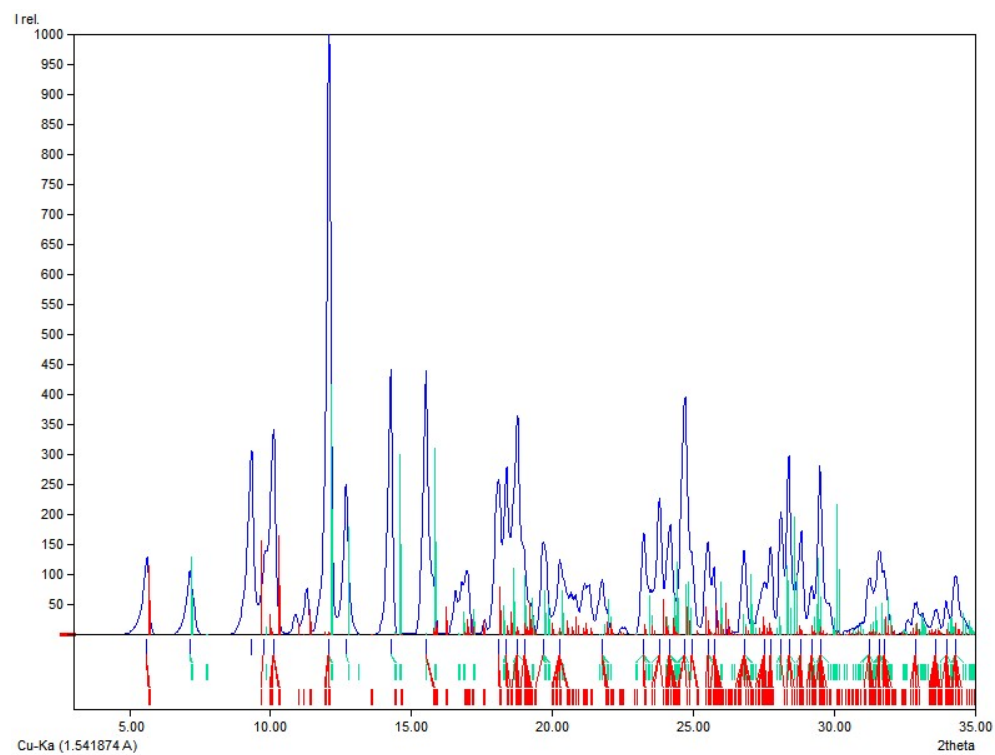

**Figure S22.** Powder pattern (blue) of **12** with overlaid calculated pattern from CIF (red). An additional  $\text{Ag}^+$ /bypm phase ( $[\text{Ag}(\text{C}_8\text{H}_6\text{N}_4)] \text{NO}_3 \cdot \text{H}_2\text{O}$ ) was identified from the CSD (Refcode: YABDIQ) and the CIF (green) overlaid.<sup>1</sup>

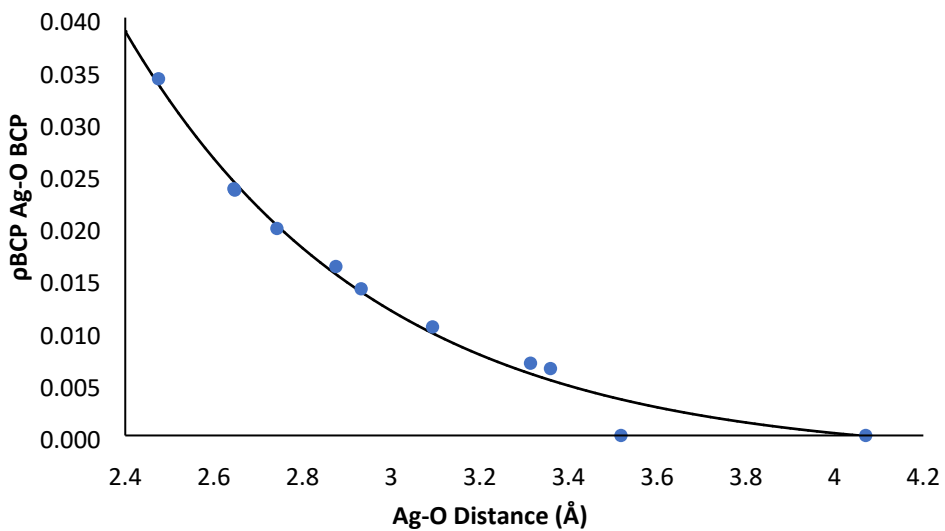

**Figure S23.**  $\rho_{\text{BCP}}$  of Ag-oxo interaction vs. Ag-O distance as calculated by QTAIM for **1-12**. Line fit equation:  $y = 2.87281 \cdot \exp(-x/0.56433) - 0.00218$ .

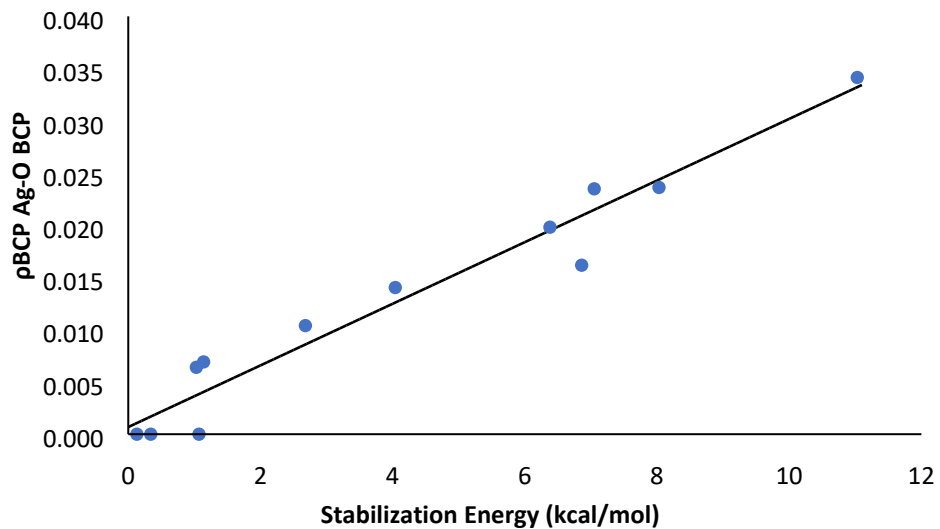

**Figure S24.**  $\rho_{\text{BCP}}$  of Ag-oxo interaction vs. stabilization energies (kcal/mol) as calculated by SOPT and QTAIM for **1-12**. Line fit equation:  $y = 0.00295x + 6.8443 \cdot 10^{-4}$

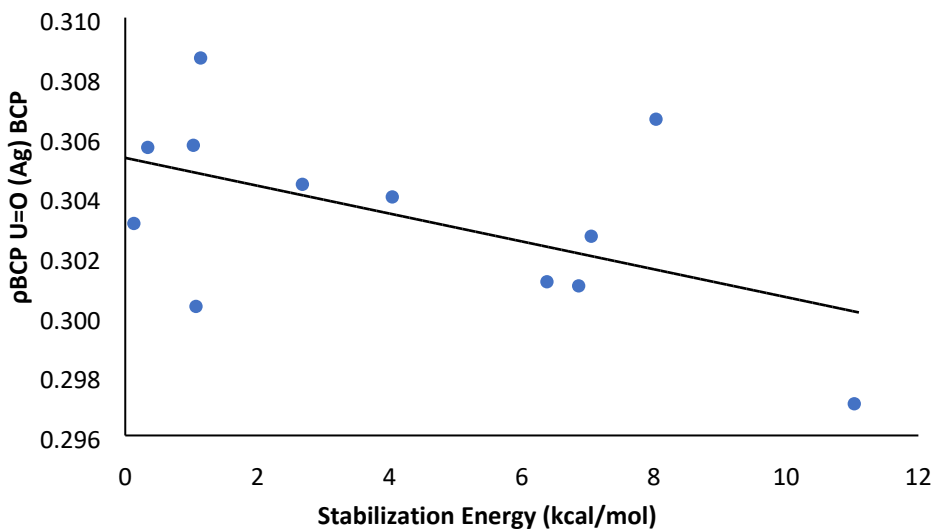

**Figure S25.**  $\rho_{\text{BCP}}$  for the U=O bond canted towards the Ag<sup>+</sup> vs stabilization energy values from SOPT and QTAIM of **1-12**. Line fit equation:  $y = -4.6659 \cdot 10^{-4} \cdot x + 0.3053$ .



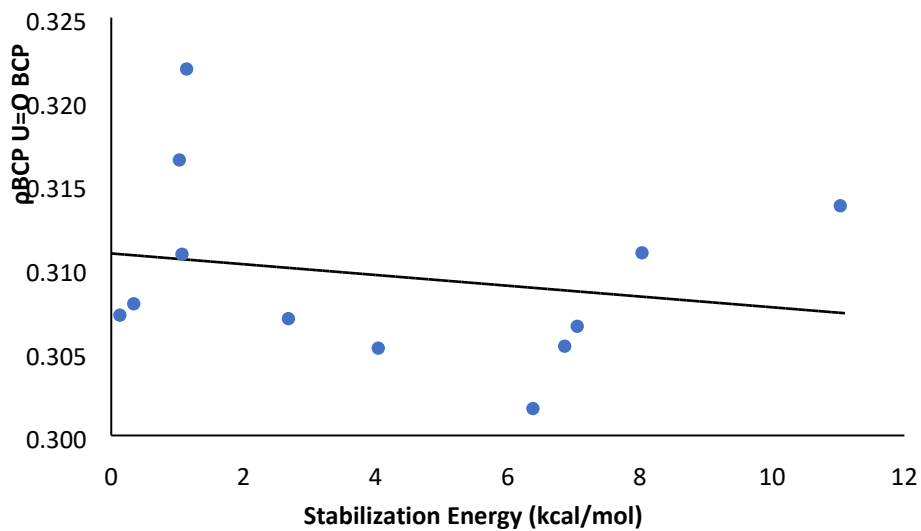

**Figure S26.**  $\rho_{BCP}$  for the U=O bond canted away from  $Ag^+$  vs stabilization energy values from SOPT and QTAIM of **1-12**. Line fit equation:  $y = -3.22096 \cdot 10^{-4} \cdot x + 0.31089$ .
